# Supplementary material for: The Expression of Serglycin Is Required for Active Transforming Growth Factor β Receptor I Tumorigenic Signaling in Glioblastoma Cells and Paracrine Activation of Stromal Fibroblasts via CXCR-2
Source: MDPI journal article supplement (doi:10.3390/biom14040461), 2024-04-10
Supplement: s1 [file s1]

# **The Expression of Serglycin Is Required for Active Transforming Growth Factor $\beta$ Receptor I Tumorigenic Signaling in Glioblastoma Cells and Paracrine Activation of Stromal Fibroblasts via CXCR-2**

Dimitra Manou, Maria-Angeliki Golfinopoulou, Sara Naif D. Alharbi, Hind A. Alghamdi, Fatimah Mohammed Alzahrani and Achilleas D. Theocharis

## **Supplementary materials**

|                  |          |
|------------------|----------|
| <b>Table S1</b>  | Page 2,3 |
| <b>Table S2</b>  | Page 4   |
| <b>Table S3</b>  | Page 5   |
| <b>Figure S1</b> | Page 6   |
| <b>Figure S2</b> | Page 7   |
| <b>Figure S3</b> | Page 8   |
| <b>Figure S4</b> | Page 9   |
| <b>Figure S5</b> | Page 10  |

**Table S1. Primer sequence used for Real-Time qPCR analysis.**

| Gene         | Primer Sequence (5'-3') |                            | T <sub>annealing</sub> (°C) |
|--------------|-------------------------|----------------------------|-----------------------------|
| CCL-2        | F                       | AAGATCTCAGTGCAGAGGCTCG     | 60                          |
|              | R                       | TTGCTTGTCCAGGTGGTCCAT      |                             |
| CCL-20       | F                       | GTGCTGCTACTCCACCTCTG       | 60                          |
|              | R                       | CGTGTGAAGCCCACAATAAA       |                             |
| CXCR-2       | F                       | CTTCACAGTCACATTCCAAGCCTC   | 58                          |
|              | R                       | GCACCAGGGCAAGCTTTCTAAAC    |                             |
| CXCL-1       | F                       | CTGAGGAGCCTGCAACATGC       | 60                          |
|              | R                       | TGATCTCATTGGCCATTTGCTT     |                             |
| GAPDH        | F                       | AGGCTGTTGTCATACTTCTCAT     | As required                 |
|              | R                       | GGAGTCCACTGGCGTCTT         |                             |
| GFAP         | F                       | TGCGGCTCGATCAACTCA         | 60                          |
|              | R                       | GTTGGTTTCATCCTGGAGCTTCT    |                             |
| IL-1 $\beta$ | F                       | GGGCAAGAAGTAGCAGTGTCTGTAAA | 60                          |
|              | R                       | AGAGAGCACACCAGTCCAAATTGA   |                             |
| IL-6         | F                       | TCCAGAACAGATTTGAGAGTAGTG   | 57                          |
|              | R                       | GCATTTGTGGTTGGGTCAGG       |                             |
| IL-8         | F                       | CTCCAAACCTTTCCACCCC        | 58                          |
|              | R                       | GATTCTTGGATACCACAGAGAATG   |                             |
| MMP-1        | F                       | CCTCGCTGGGAGCAAACA         | 60                          |
|              | R                       | TTGGCAAATCTGGCGTGTA        |                             |
| MMP-2        | F                       | CGTCTGTCCCAGGATGACATC      | 62                          |
|              | R                       | ATGTCAGGAGAGGCCCCATA       |                             |
| MMP-3        | F                       | ATTCCATGGAGCCAGGCTTTC      | 60                          |
|              | R                       | CATTTGGGTCAAACCTCCAACCTGTG |                             |
| MMP-9        | F                       | TTCCAGTACCGAGAGAAAGCCTAT   | 60                          |
|              | R                       | GGTCACGTAGCCCACTTGGT       |                             |
| MMP-14       | F                       | CATGGGCAGCGATGAAGTCT       | 60                          |
|              | R                       | CCAGTATTTGTTCCCTTGTAGAAGTA |                             |
| PAI-1        | F                       | CTGACTTCACGAGTCTTTCAGACC   | 60                          |
|              | R                       | CCCATGAAAAGGACTGTTCTGTG    |                             |

|                 |   |                           |    |
|-----------------|---|---------------------------|----|
| SNAIL           | F | CACTATGCCGCGCTCTTTC       | 60 |
|                 | R | GCTGGAAGGTAAACTCTGGATTAGA |    |
| SRGN            | F | GTTGGCGTGCAGCTGGGAGA      | 60 |
|                 | R | GGCTCTCCGCGTAGGATAACCTTG  |    |
| TGF $\beta$ 1   | F | GCCTTTCCTGCTTCTCATGG      | 60 |
|                 | R | TCCTTGCGGAAGTCAATGTAC     |    |
| TGF $\beta$ 2   | F | GCGACGAAGAGTACTACGCC      | 60 |
|                 | R | TGGCATCAAGGTACCCACAG      |    |
| TGF $\beta$ RI  | F | TGGCTCAGGTTTACCATTGCTT    | 60 |
|                 | R | AACTTCTTCTCCCCGCCACT      |    |
| TGF $\beta$ RII | F | AGAGACAGTTTGCCATGACCC     | 60 |
|                 | R | ACAAGTCAGGATTGCTGGTGTT    |    |
| uPA             | F | ACTACTACGGCTCTGAAGTCACCA  | 60 |
|                 | R | GAAGTGTGAGACTCTCGTGTAGAC  |    |

**Table S2. Expression comparison values of genes of interest in GBM, LGG and non-tumor brain used for Fig1B heatmap.**

Value indicates the log scale of transcripts per million (TPM):  $\log_2(\text{TPM}+1)$ .

| <b>GENE</b>          | <b>GBM</b> | <b>LGG</b> | <b>Brain</b> |
|----------------------|------------|------------|--------------|
| <b><i>SRGN</i></b>   | 7.10       | 5.70       | 4.30         |
| <b><i>CCL-2</i></b>  | 6.70       | 4.50       | 1.80         |
| <b><i>TGFβ1</i></b>  | 5.50       | 4.70       | 2.60         |
| <b><i>TGFβRI</i></b> | 4.30       | 3.70       | 1.50         |
| <b><i>IL-8</i></b>   | 4.00       | 0.80       | 0.60         |
| <b><i>IL-1β</i></b>  | 3.20       | 2.10       | 0.60         |
| <b><i>CXCL-1</i></b> | 1.40       | 0.70       | 0.90         |
| <b><i>CCL-20</i></b> | 1.20       | 0.20       | 0.10         |
| <b><i>CXCR-2</i></b> | 0.90       | 0.30       | 0.20         |
| <b><i>IL-6</i></b>   | 0.30       | 0.10       | 0.10         |
| <b><i>MMP-9</i></b>  | 3.90       | 0.30       | 0.30         |
| <b><i>MMP-14</i></b> | 6.20       | 4.10       | 1.50         |
| <b><i>uPA</i></b>    | 4.50       | 1.70       | 0.70         |
| <b><i>PAI-1</i></b>  | 5.70       | 2.30       | 0.70         |
| <b><i>MMP-1</i></b>  | 0.50       | 0.00       | 0.00         |
| <b><i>MMP-2</i></b>  | 5.80       | 4.30       | 1.30         |

**Table S3. Correlation analysis values of genes of interest with SRGN in GBM used for Fig1F heatmap.**

Value indicates the correlation R value of  $\log_2(\text{SRGN TPM})$  plotted with  $\log_2(\text{gene of interest TPM})$ .

| <b>GENE</b>          | <b>Value</b> | <b>GENE</b>          | <b>Value</b> |
|----------------------|--------------|----------------------|--------------|
| <b><i>CCL-2</i></b>  | 0.64         | <b><i>MMP-9</i></b>  | 0.35         |
| <b><i>TGFβ1</i></b>  | 0.63         | <b><i>MMP-14</i></b> | 0.38         |
| <b><i>TGFβRI</i></b> | 0.55         | <b><i>uPA</i></b>    | 0.45         |
| <b><i>IL-8</i></b>   | 0.75         | <b><i>PAI-1</i></b>  | 0.45         |
| <b><i>IL-1β</i></b>  | 0.63         | <b><i>MMP-1</i></b>  | 0.33         |
| <b><i>CXCL-1</i></b> | 0.51         | <b><i>MMP-2</i></b>  | 0.34         |
| <b><i>CCL-20</i></b> | 0.75         |                      |              |
| <b><i>CXCR-2</i></b> | 0.49         |                      |              |
| <b><i>IL-6</i></b>   | 0.63         |                      |              |

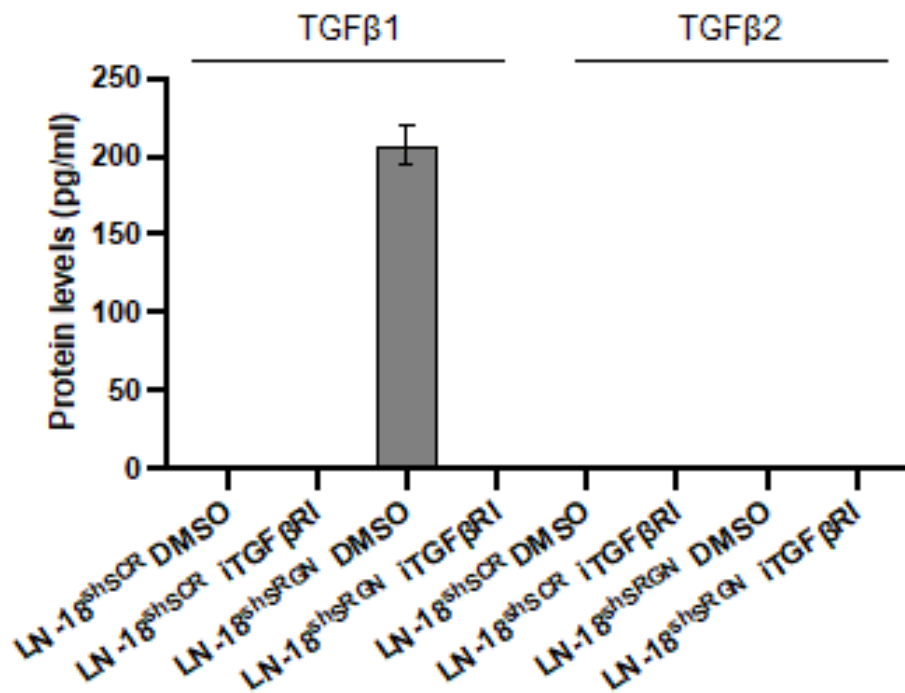

**Figure S1. Serglycin knockdown increases the expression and secretion of TGFβ1.**

The protein levels (pg/mL) of secreted TGFβ1 and TGFβ2 in control LN-18<sup>shSCR</sup> and LN-18<sup>shSRGN</sup> cells were analyzed by quantitative ELISA in culture media after incubation with SF medium for 72 h either in the presence of 3μM iTGFβRI dissolved in DMSO or equal volume of DMSO, which were added at 0 and 36 h. We have analyzed non-concentrated culture medium supernatants by using human TGFβ1 Quantikine ELISA kit (DB100B, R&D Systems Inc., Minneapolis, MN, USA) and TGFβ2 Quantikine ELISA kit (DB250, R&D Systems Inc., Minneapolis, MN, USA), respectively, according to the manufacturer's instructions. The minimum detectable dose of human TGF-β1 and TGF-β2 is 15.0 pg/mL and 7.0 pg/mL, respectively.

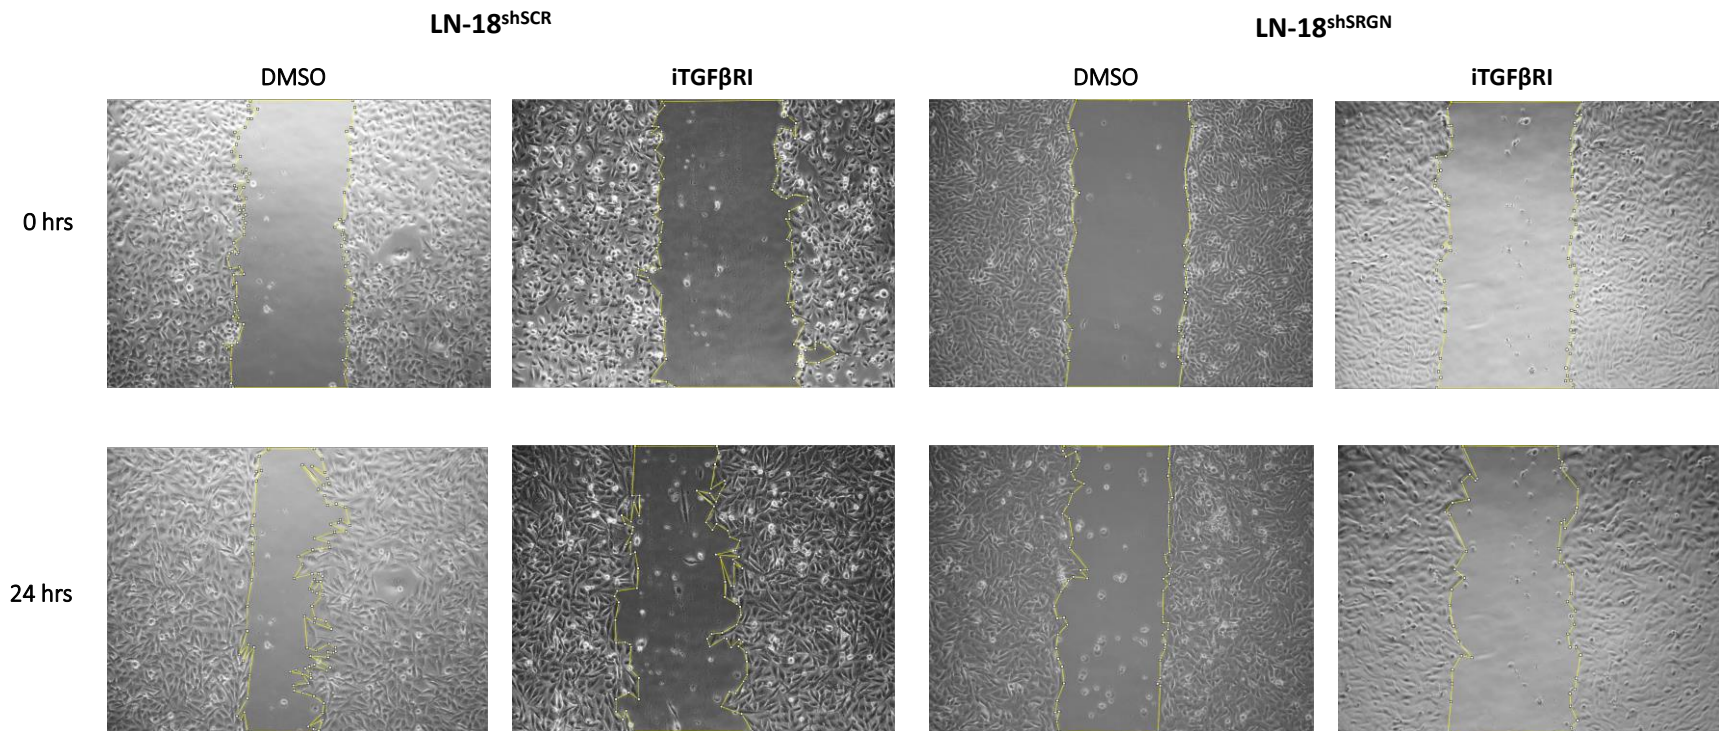

**Figure S2. Representative photos for the wound healing assay shown in Fig.2C.**

To investigate the role of the TGF $\beta$  pathway to affect the migration of GBM cells, LN-18<sup>shSCR</sup> and LN-18<sup>shSRGN</sup> cells were seeded in 24 well plates and incubated with complete medium for 24 h followed by overnight starvation in SF medium. Cells were then scratched using a 100  $\mu$ L pipette tip. Detached cells were removed by washing and cells were incubated for 40 min at 37°C with SF media containing 10  $\mu$ M of the cytostatic agent cytarabine (Sigma- Aldrich) and then were photographed (time=0 hrs). Afterwards, cells were incubated for 24 h with SF medium in the presence of 3 $\mu$ M iTGF $\beta$ RI dissolved in DMSO or equal volume of DMSO and then were photographed (time=24 hrs).

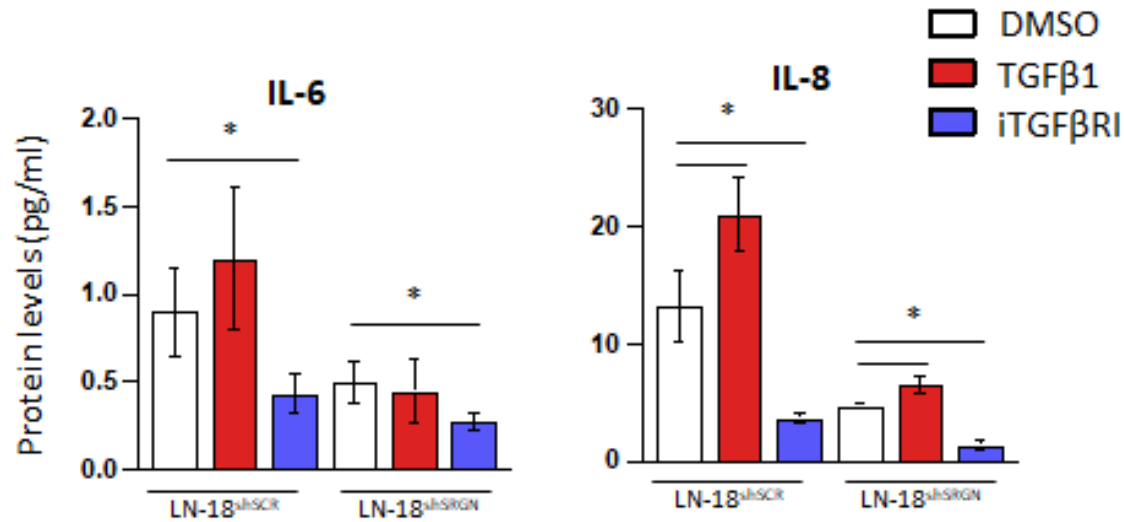

**Figure S3. TGFβ signaling affects the expression of IL-6 and IL-8 in LN-18<sup>shSCR</sup> cells.**

Protein levels of IL-6 and IL-8 in LN-18<sup>shSCR</sup> and LN-18<sup>shSRGN</sup> cells after treatment with either TGFβ1 or iTGFβRI. The protein levels (pg/mL) of secreted IL-6 and IL-8 in control LN-18<sup>shSCR</sup> and LN-18<sup>shSRGN</sup> cells were analyzed by quantitative ELISA in culture media after incubation with SF medium for 48 h either in the presence of 3μM iTGFβRI dissolved in DMSO or TGFβ1 at final concentration 5ng/ml or equal volume of DMSO. Statistically significant differences are displayed by bars and asterisk: \* (p < 0.05).



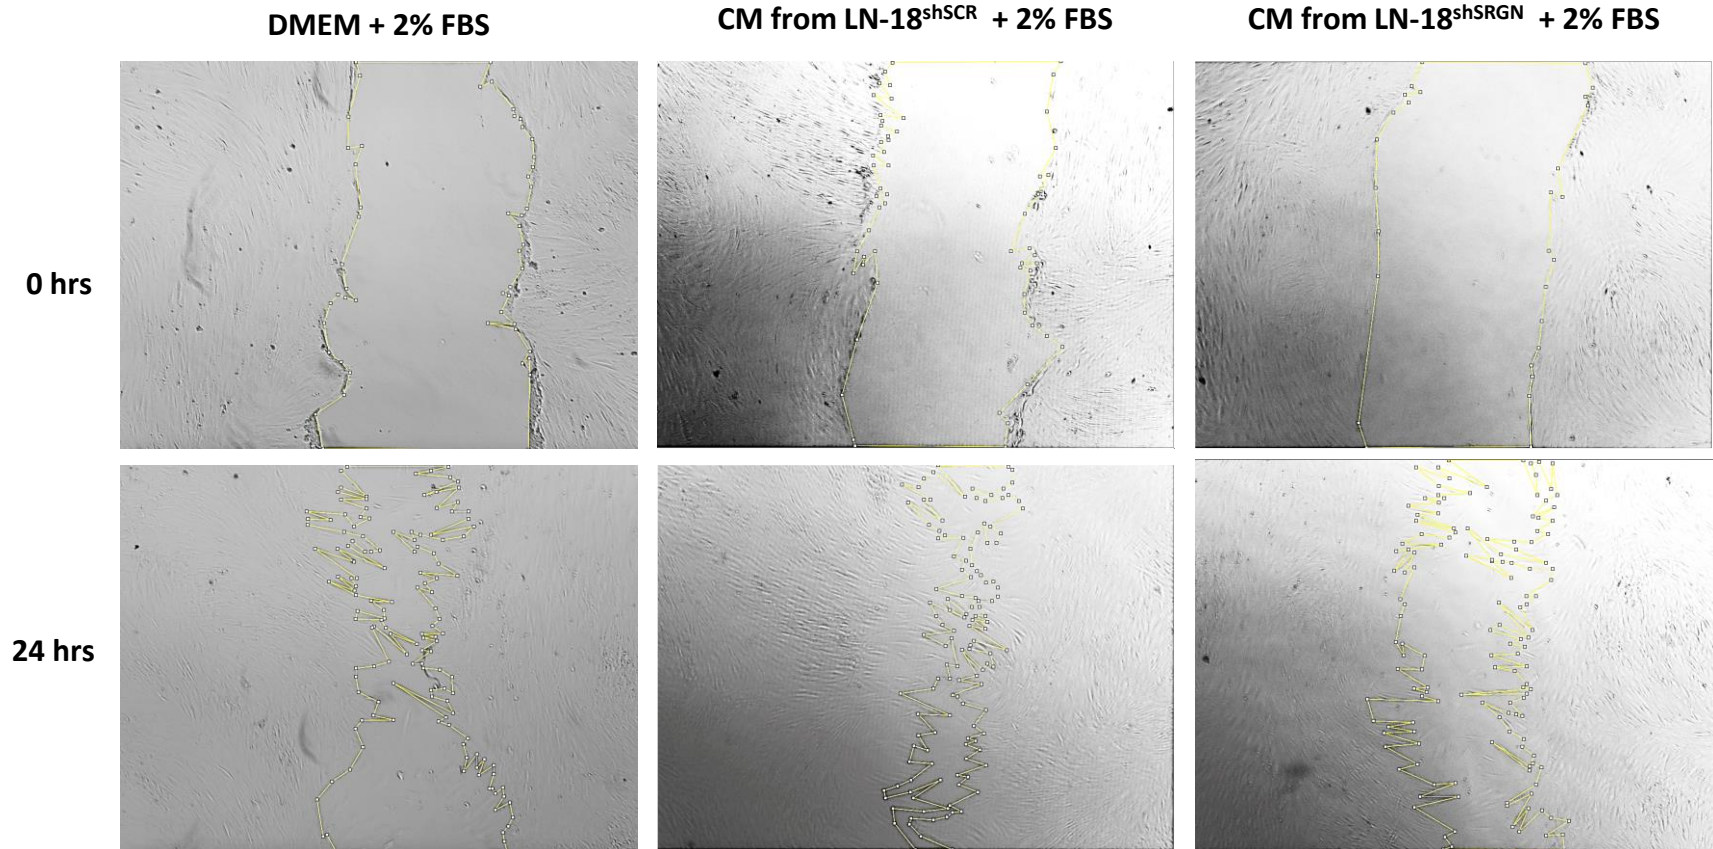

**Figure S4. Representative photos for the wound healing assay shown in Fig.4B.**

To investigate the role of CM from LN-18<sup>shSCR</sup> or LN-18<sup>shSRGN</sup> cells to induce the migration of fibroblasts, fibroblasts were seeded in 12 well plates and incubated with complete medium for 16 h followed by an incubation period of 4 h with medium supplemented with 2% FBS. Cells were then scratched using a 100  $\mu$ L pipette tip. Detached cells were removed by washing and then were photographed (time=0 hrs). Afterwards, fibroblasts were incubated for 24 h either with CM of LN-18<sup>shSCR</sup> or LN-18<sup>shSRGN</sup> cells or control DMEM medium, all supplemented with 2% FBS and then were photographed (time=24 hrs).

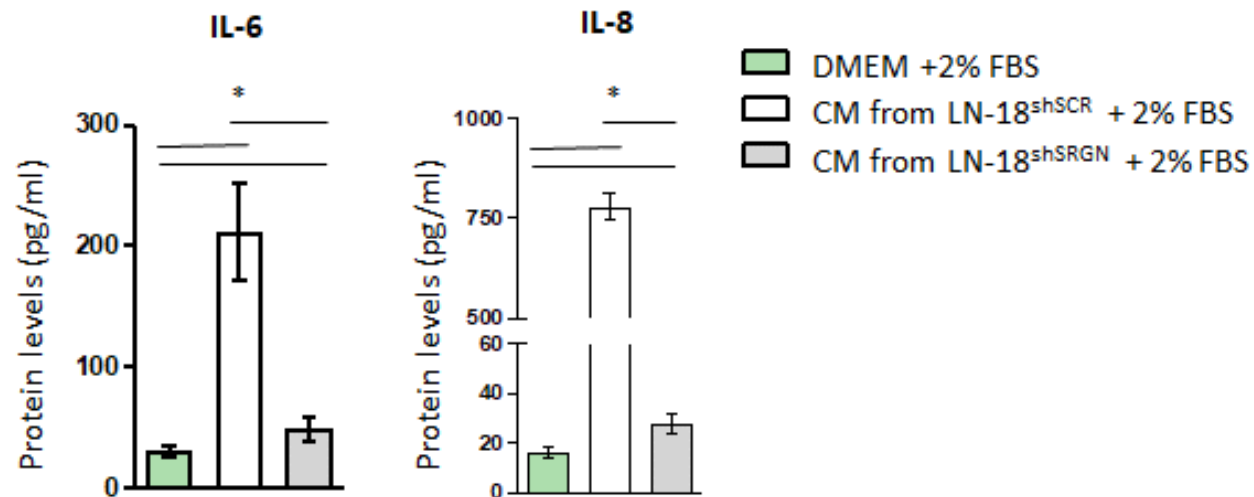

**Figure S5. SRGN is important for LN-18 cells to induce inflammatory cascades in fibroblasts.**

Protein levels of IL-6 and IL-8 in fibroblasts treated with either culture media (CM) from LN-18<sup>shSCR</sup> or LN-18<sup>shSRGN</sup> cells or control media all supplemented with 2% FBS. The protein levels (pg/mL) of secreted IL-6 and IL-8 were analyzed by quantitative ELISA in concentrated culture media. Statistically significant differences are displayed by bars and asterisk: \* ( $p < 0.05$ ).
